# Supplementary material for: Pancreatic, but not myeloid-cell, expression of interleukin-1alpha is required for maintenance of insulin secretion and whole body glucose homeostasis
Source: PubMed Central journal article supplement — Mol Metab. 2020 Dec 5;44:101140. doi: 10.1016/j.molmet.2020.101140 (PMC7772372; doi:10.1016/j.molmet.2020.101140), 2020-12-05
Supplement: mmc2.pdf [file mmc2.pdf]

**Supplementary Table 1. Known characteristics of human islet preparations used.**

| <b>Islet preparation</b>                                                               | <b>1</b>                                              | <b>2</b>                                              | <b>3</b>                                              |
|----------------------------------------------------------------------------------------|-------------------------------------------------------|-------------------------------------------------------|-------------------------------------------------------|
| <b>Donor demographics</b>                                                              |                                                       |                                                       |                                                       |
| Unique identifier                                                                      | 00202998 (1009)                                       | 00202998(1025)                                        | 00212595(01122017)                                    |
| Age (years)                                                                            | 52                                                    | 50                                                    | 41                                                    |
| Sex (M/F)                                                                              | M                                                     | M                                                     | M                                                     |
| BMI (kg/m <sup>2</sup> )                                                               | 34.2                                                  | 27.4                                                  | 29.2                                                  |
| Ethnicity                                                                              | White                                                 | White                                                 | White                                                 |
| HbA <sub>1c</sub>                                                                      | n/a                                                   | n/a                                                   | 5.6                                                   |
| Cause of death                                                                         | n/a                                                   | n/a                                                   | n/a                                                   |
| <b>Diabetes? (Y/N)</b>                                                                 | <b>N</b>                                              | <b>N</b>                                              | <b>N</b>                                              |
| <b>Islet handling and use</b>                                                          |                                                       |                                                       |                                                       |
| Estimated purity (%)                                                                   | 90                                                    | 80                                                    | 95                                                    |
| Estimated viability (%)*                                                               | 85                                                    | 80                                                    | 97.8                                                  |
| Total culture time (d)                                                                 | 3                                                     | 7                                                     | 3                                                     |
| Description of purification and quantification                                         | DTZ staining; manual count via brightfield microscope | DTZ staining; manual count via brightfield microscope | DTZ staining; manual count via brightfield microscope |
| Experimental islet use (including in which experiment each islet preparation was used) | Figure 1G                                             | Figure 1G                                             | Figure 1G                                             |
| * viability determined by                                                              | Membrane integrity using FDA/PI                       | Membrane integrity using FDA/PI                       | Membrane integrity using FDA/PI                       |
